# Supplementary material for: Inside Late Bronze Age Settlements in NE Romania: GIS-Based Surface Characterization of Ashmound Structures Using Airborne Laser Scanning and Aerial Photography Techniques
Source: MDPI journal article supplement (doi:10.3390/rs15174124), 2023-08-22
Supplement: s1 [file s1]

# Supplementary Materials

**Table S1:** Code / name, location and morphometric parameters of 200 visible ashmounds structures specific for 21 NC-LBA sites in NE Romania. Abbreviation: NC-LBA - Noua Culture-Late Bronze Age; A – area; P – perimeter; L – maximum length; RF – form factor; RC - circularity ratio; RE - elongation ratio; S – terrain slope; HI - hypsometric indices.

| NC-LBA site Id and name                    | Ashmound code | Latitude (Y) | Longitude (X) | Altitude (Z) | A [m <sup>2</sup> ] | P [m]  | L [m] | RF   | RC   | RE   | S [°] | HI   |
|--------------------------------------------|---------------|--------------|---------------|--------------|---------------------|--------|-------|------|------|------|-------|------|
| S1 / Todireni - Hârtopul Căldării          | S1.1          | 685857.80    | 663378.36     | 110.6        | 999.87              | 118.88 | 45.40 | 0.49 | 0.89 | 0.79 | 4.69  | 0.52 |
|                                            | S1.2          | 685846.64    | 663433.81     | 108.5        | 933.46              | 111.17 | 39.57 | 0.60 | 0.95 | 0.87 | 4.06  | 0.52 |
|                                            | S1.3          | 685866.53    | 663464.18     | 108.5        | 445.93              | 78.62  | 29.34 | 0.52 | 0.91 | 0.81 | 5.34  | 0.50 |
|                                            | S1.4          | 685892.46    | 663514.06     | 107.2        | 851.59              | 106.48 | 37.50 | 0.61 | 0.94 | 0.88 | 5.09  | 0.50 |
|                                            | S1.5          | 685930.29    | 663505.15     | 109.9        | 619.49              | 93.81  | 33.70 | 0.55 | 0.88 | 0.83 | 5.37  | 0.49 |
|                                            | S1.6          | 685913.20    | 663471.67     | 110.8        | 1187.05             | 127.39 | 47.17 | 0.53 | 0.92 | 0.82 | 4.36  | 0.55 |
|                                            | S1.7          | 685962.75    | 663487.94     | 112.5        | 1141.05             | 122.39 | 42.15 | 0.64 | 0.96 | 0.90 | 4.93  | 0.51 |
|                                            | S1.8          | 685910.49    | 663421.66     | 112.3        | 1478.32             | 139.08 | 48.08 | 0.64 | 0.96 | 0.90 | 4.38  | 0.50 |
|                                            | S1.9          | 685964.74    | 663433.90     | 115.0        | 1847.67             | 160.46 | 59.23 | 0.53 | 0.90 | 0.82 | 3.87  | 0.51 |
|                                            | S1.10         | 685956.50    | 663367.92     | 116.7        | 1060.98             | 119.71 | 44.76 | 0.53 | 0.93 | 0.82 | 4.63  | 0.48 |
|                                            | S1.11         | 686034.29    | 663464.44     | 116.6        | 604.60              | 89.86  | 30.31 | 0.66 | 0.94 | 0.92 | 4.86  | 0.49 |
|                                            | S1.12         | 686029.23    | 663440.28     | 117.8        | 511.94              | 87.49  | 35.38 | 0.41 | 0.84 | 0.72 | 4.84  | 0.52 |
|                                            | S1.13         | 686012.28    | 663401.36     | 118.8        | 851.43              | 106.12 | 37.15 | 0.62 | 0.95 | 0.89 | 4.65  | 0.45 |
|                                            | S1.14         | 686011.23    | 663365.72     | 120.0        | 729.72              | 98.13  | 34.60 | 0.61 | 0.95 | 0.88 | 4.62  | 0.48 |
|                                            | S1.15         | 686001.59    | 663327.69     | 120.0        | 1072.15             | 120.59 | 41.27 | 0.63 | 0.93 | 0.89 | 5.06  | 0.47 |
|                                            | S1.16         | 685948.05    | 663324.54     | 114.8        | 664.23              | 100.62 | 38.72 | 0.44 | 0.82 | 0.75 | 8.07  | 0.53 |
| S2 / Pleşani - Crăcălia                    | S2.1          | 676955.03    | 671796.52     | 83.1         | 1086.27             | 121.48 | 42.95 | 0.59 | 0.93 | 0.87 | 3.38  | 0.47 |
|                                            | S2.2          | 676922.54    | 671841.20     | 79.6         | 1519.68             | 140.24 | 47.02 | 0.69 | 0.97 | 0.94 | 4.49  | 0.47 |
|                                            | S2.3          | 676956.51    | 671892.34     | 77.7         | 896.40              | 107.77 | 35.43 | 0.71 | 0.97 | 0.95 | 3.98  | 0.48 |
|                                            | S2.4          | 676941.35    | 671944.78     | 74.4         | 927.05              | 111.11 | 38.35 | 0.63 | 0.94 | 0.90 | 3.99  | 0.45 |
|                                            | S2.5          | 677043.01    | 671774.51     | 87.8         | 1256.50             | 128.70 | 44.45 | 0.64 | 0.95 | 0.90 | 4.70  | 0.47 |
|                                            | S2.6          | 677054.12    | 671837.03     | 84.4         | 938.93              | 112.37 | 39.32 | 0.61 | 0.93 | 0.88 | 5.24  | 0.50 |
|                                            | S2.7          | 676995.76    | 671852.94     | 81.6         | 764.82              | 101.30 | 31.90 | 0.75 | 0.94 | 0.98 | 5.21  | 0.49 |
|                                            | S2.8          | 677011.21    | 671740.57     | 87.5         | 1363.24             | 140.94 | 54.44 | 0.46 | 0.86 | 0.77 | 3.30  | 0.52 |
|                                            | S2.9          | 676949.28    | 671753.23     | 83.9         | 1189.72             | 129.37 | 48.32 | 0.51 | 0.89 | 0.81 | 3.85  | 0.53 |
|                                            | S2.10         | 676890.80    | 671875.91     | 76.5         | 1255.26             | 136.58 | 53.28 | 0.44 | 0.85 | 0.75 | 3.56  | 0.49 |
| S3 / Alexandru cel Bun - Dealului Iacobeni | S3.1          | 664897.99    | 672667.75     | 79.9         | 1101.37             | 119.25 | 39.35 | 0.71 | 0.97 | 0.95 | 3.49  | 0.59 |
|                                            | S3.2          | 664912.42    | 672604.56     | 81.0         | 497.47              | 81.37  | 27.61 | 0.65 | 0.94 | 0.91 | 2.29  | 0.57 |
| S4 / Bădeni - Dealul Moara de Vânt         | S4.1          | 661728.88    | 653965.18     | 161.8        | 1266.74             | 128.72 | 43.50 | 0.67 | 0.96 | 0.92 | 3.57  | 0.53 |
|                                            | S4.2          | 661701.31    | 653922.22     | 164.6        | 745.98              | 100.90 | 35.41 | 0.59 | 0.92 | 0.87 | 3.06  | 0.52 |
|                                            | S4.3          | 661643.40    | 653890.03     | 167.5        | 795.14              | 104.42 | 34.45 | 0.67 | 0.92 | 0.92 | 2.96  | 0.57 |
|                                            | S4.4          | 661601.96    | 653924.25     | 167.8        | 1241.22             | 127.73 | 43.70 | 0.65 | 0.96 | 0.91 | 2.98  | 0.56 |
|                                            | S4.5          | 661558.81    | 653896.43     | 169.8        | 740.87              | 100.98 | 36.90 | 0.54 | 0.91 | 0.83 | 2.83  | 0.48 |
|                                            | S4.6          | 661559.34    | 653958.55     | 168.1        | 1412.53             | 139.76 | 53.84 | 0.49 | 0.91 | 0.79 | 3.05  | 0.54 |
|                                            | S4.7          | 661602.93    | 653989.51     | 165.3        | 875.80              | 108.24 | 39.20 | 0.57 | 0.94 | 0.85 | 4.26  | 0.58 |
|                                            | S4.8          | 661534.37    | 654030.29     | 166.1        | 707.46              | 97.08  | 32.76 | 0.66 | 0.94 | 0.92 | 3.68  | 0.56 |
|                                            | S4.9          | 661599.34    | 654032.75     | 163.4        | 571.50              | 87.05  | 29.72 | 0.65 | 0.95 | 0.91 | 4.44  | 0.52 |
|                                            | S4.10         | 661640.44    | 654060.43     | 160.5        | 1208.61             | 128.75 | 46.69 | 0.55 | 0.92 | 0.84 | 4.46  | 0.58 |
|                                            | S4.11         | 661673.13    | 653982.35     | 163.3        | 1258.37             | 128.69 | 43.15 | 0.68 | 0.96 | 0.93 | 3.84  | 0.54 |
|                                            | S4.12         | 661684.93    | 654115.55     | 154.9        | 1156.77             | 124.25 | 42.46 | 0.64 | 0.94 | 0.90 | 4.82  | 0.52 |
|                                            | S4.13         | 661695.00    | 654046.06     | 158.7        | 2224.40             | 171.89 | 58.77 | 0.64 | 0.95 | 0.91 | 4.05  | 0.53 |
|                                            | S4.14         | 661648.78    | 654012.25     | 162.5        | 469.50              | 79.40  | 26.62 | 0.66 | 0.94 | 0.92 | 3.86  | 0.55 |
|                                            | S4.15         | 661394.60    | 654503.04     | 160.2        | 562.19              | 88.10  | 31.77 | 0.56 | 0.91 | 0.84 | 3.63  | 0.51 |
|                                            | S4.16         | 661681.29    | 654314.13     | 150.6        | 606.43              | 98.34  | 39.49 | 0.39 | 0.79 | 0.70 | 7.25  | 0.43 |
| S5 / Fântânele - Vatra Satului             | S5.1          | 659485.88    | 665255.30     | 105.1        | 2654.85             | 187.37 | 66.60 | 0.60 | 0.95 | 0.87 | 4.82  | 0.42 |
|                                            | S5.2          | 659499.92    | 665318.67     | 108.4        | 895.63              | 109.10 | 37.74 | 0.63 | 0.95 | 0.89 | 4.92  | 0.50 |
|                                            | S5.3          | 659549.29    | 665293.08     | 111.0        | 1712.89             | 155.60 | 60.88 | 0.46 | 0.89 | 0.77 | 5.62  | 0.50 |
|                                            | S5.4          | 659539.75    | 665211.16     | 105.5        | 1252.75             | 130.62 | 47.48 | 0.56 | 0.92 | 0.84 | 5.52  | 0.49 |
|                                            | S5.5          | 659603.69    | 665232.51     | 111.8        | 1354.44             | 137.79 | 52.98 | 0.48 | 0.90 | 0.78 | 6.62  | 0.48 |
|                                            | S5.6          | 659590.05    | 665177.13     | 106.7        | 981.84              | 116.35 | 44.30 | 0.50 | 0.91 | 0.80 | 6.66  | 0.48 |
|                                            | S5.7          | 659457.77    | 665206.23     | 100.6        | 712.44              | 99.46  | 37.35 | 0.51 | 0.91 | 0.81 | 5.86  | 0.51 |
|                                            | S5.8          | 659416.54    | 665247.43     | 100.2        | 680.42              | 98.95  | 36.35 | 0.51 | 0.87 | 0.81 | 5.12  | 0.43 |
|                                            | S5.9          | 659482.75    | 665186.29     | 100.7        | 470.34              | 79.54  | 27.43 | 0.63 | 0.93 | 0.89 | 4.99  | 0.52 |
|                                            | S5.10         | 659458.59    | 665322.30     | 105.7        | 621.81              | 91.13  | 31.13 | 0.64 | 0.94 | 0.90 | 4.02  | 0.52 |
|                                            | S5.11         | 659454.80    | 665388.52     | 107.1        | 1382.45             | 133.48 | 44.82 | 0.69 | 0.98 | 0.94 | 4.62  | 0.56 |
|                                            | S5.12         | 659578.77    | 665406.56     | 111.8        | 971.98              | 120.00 | 46.59 | 0.45 | 0.85 | 0.75 | 4.81  | 0.54 |

|                                                |        |           |           |       |         |        |       |      |      |      |      |      |
|------------------------------------------------|--------|-----------|-----------|-------|---------|--------|-------|------|------|------|------|------|
|                                                | S5.13  | 659626.63 | 665302.80 | 116.4 | 2656.59 | 187.72 | 61.66 | 0.70 | 0.95 | 0.94 | 4.83 | 0.46 |
| <b>S6 / Coarnele Caprei - Dealul Aramei I</b>  | S6.1   | 658801.05 | 657486.16 | 136.3 | 1332.30 | 135.49 | 50.80 | 0.52 | 0.91 | 0.81 | 6.34 | 0.49 |
|                                                | S6.2   | 658772.79 | 657540.40 | 136.9 | 1244.19 | 130.80 | 45.92 | 0.59 | 0.91 | 0.87 | 6.49 | 0.50 |
|                                                | S6.3   | 658763.86 | 657615.98 | 140.8 | 1156.67 | 124.99 | 44.16 | 0.59 | 0.93 | 0.87 | 6.52 | 0.52 |
|                                                | S6.4   | 658872.88 | 657517.17 | 144.1 | 1072.25 | 118.98 | 37.25 | 0.77 | 0.95 | 0.99 | 5.76 | 0.50 |
|                                                | S6.5   | 658854.72 | 657597.87 | 147.5 | 848.51  | 109.14 | 41.21 | 0.50 | 0.90 | 0.80 | 5.73 | 0.49 |
|                                                | S6.6   | 658897.88 | 657586.15 | 149.9 | 528.64  | 83.89  | 29.12 | 0.62 | 0.94 | 0.89 | 4.91 | 0.51 |
|                                                | S6.7   | 658864.17 | 657708.84 | 153.0 | 300.10  | 62.79  | 20.69 | 0.70 | 0.96 | 0.94 | 3.48 | 0.50 |
|                                                | S6.8   | 658834.60 | 657454.34 | 136.9 | 633.46  | 92.62  | 33.16 | 0.58 | 0.93 | 0.86 | 5.89 | 0.49 |
| <b>S7 / Bădeni - Gurguieta II</b>              | S7.1   | 658921.13 | 652665.90 | 102.3 | 894.76  | 108.34 | 36.41 | 0.67 | 0.96 | 0.93 | 4.02 | 0.51 |
|                                                | S7.2   | 658916.44 | 652724.06 | 99.4  | 941.44  | 113.98 | 42.46 | 0.52 | 0.91 | 0.82 | 4.17 | 0.54 |
|                                                | S7.3   | 658970.71 | 652686.03 | 102.7 | 407.44  | 74.88  | 28.03 | 0.52 | 0.91 | 0.81 | 4.20 | 0.51 |
|                                                | S7.4   | 658853.09 | 652731.88 | 97.0  | 936.77  | 113.83 | 41.21 | 0.55 | 0.91 | 0.84 | 4.69 | 0.47 |
|                                                | S7.5   | 658871.67 | 652677.07 | 98.4  | 1137.25 | 126.15 | 49.02 | 0.47 | 0.90 | 0.78 | 5.66 | 0.58 |
|                                                | S7.6   | 658945.22 | 652589.66 | 103.9 | 1369.37 | 139.82 | 49.76 | 0.55 | 0.88 | 0.84 | 5.47 | 0.55 |
| <b>S8 / Coarnele Caprei - Arama</b>            | S8.1   | 658426.44 | 658778.16 | 126.5 | 729.46  | 99.45  | 36.12 | 0.56 | 0.93 | 0.84 | 4.76 | 0.46 |
|                                                | S8.2   | 658396.11 | 658698.37 | 120.0 | 884.79  | 108.21 | 35.43 | 0.70 | 0.95 | 0.95 | 3.66 | 0.43 |
|                                                | S8.3   | 658504.81 | 658744.47 | 127.8 | 478.02  | 79.77  | 28.01 | 0.61 | 0.94 | 0.88 | 5.21 | 0.53 |
|                                                | S8.4   | 658453.59 | 658728.76 | 124.6 | 1033.67 | 118.29 | 41.99 | 0.59 | 0.93 | 0.86 | 5.19 | 0.52 |
|                                                | S8.5   | 658399.62 | 658802.26 | 127.1 | 348.71  | 67.93  | 23.38 | 0.64 | 0.95 | 0.90 | 4.28 | 0.44 |
|                                                | S8.6   | 658400.38 | 658875.62 | 132.3 | 314.69  | 67.23  | 24.99 | 0.50 | 0.88 | 0.80 | 3.93 | 0.57 |
|                                                | S8.7   | 658317.44 | 658770.73 | 121.9 | 980.70  | 117.31 | 41.97 | 0.56 | 0.90 | 0.84 | 4.70 | 0.50 |
| <b>S9 / Coarnele Caprei - Dealul Aramei II</b> | S9.1   | 658157.55 | 658200.36 | 104.3 | 831.00  | 106.44 | 39.34 | 0.54 | 0.92 | 0.83 | 5.52 | 0.55 |
|                                                | S9.2   | 658110.68 | 658224.35 | 99.6  | 576.86  | 86.53  | 28.69 | 0.70 | 0.97 | 0.94 | 6.61 | 0.48 |
|                                                | S9.3   | 658168.70 | 658313.06 | 102.0 | 851.33  | 106.76 | 37.62 | 0.60 | 0.94 | 0.87 | 6.60 | 0.59 |
|                                                | S9.4   | 658187.17 | 658257.88 | 106.0 | 511.55  | 83.59  | 30.44 | 0.55 | 0.92 | 0.84 | 2.50 | 0.56 |
|                                                | S9.5   | 658132.43 | 658264.38 | 101.8 | 272.77  | 61.06  | 21.80 | 0.57 | 0.92 | 0.85 | 4.51 | 0.48 |
| <b>S10 / Ceplenița - Dealul Ion Clacă</b>      | S10.1  | 655590.15 | 655553.86 | 91.5  | 965.98  | 114.21 | 39.33 | 0.62 | 0.93 | 0.89 | 3.25 | 0.49 |
|                                                | S10.2  | 655606.34 | 655623.12 | 91.2  | 975.37  | 115.46 | 41.49 | 0.57 | 0.92 | 0.85 | 3.42 | 0.54 |
|                                                | S10.3  | 655673.58 | 655638.01 | 92.8  | 894.16  | 110.54 | 41.96 | 0.51 | 0.92 | 0.80 | 3.53 | 0.44 |
|                                                | S10.4  | 655660.81 | 655551.71 | 93.9  | 1376.44 | 134.47 | 47.26 | 0.62 | 0.96 | 0.89 | 2.37 | 0.56 |
|                                                | S10.5  | 655746.07 | 655585.85 | 96.3  | 875.34  | 107.45 | 37.77 | 0.61 | 0.95 | 0.88 | 1.95 | 0.57 |
|                                                | S10.6  | 655778.17 | 655499.02 | 97.9  | 982.58  | 115.49 | 42.91 | 0.53 | 0.93 | 0.82 | 2.80 | 0.50 |
|                                                | S10.7  | 655827.53 | 655553.66 | 98.8  | 533.22  | 88.71  | 34.16 | 0.46 | 0.85 | 0.76 | 2.76 | 0.55 |
|                                                | S10.8  | 655729.13 | 655458.85 | 94.8  | 911.91  | 113.90 | 43.47 | 0.48 | 0.88 | 0.78 | 4.16 | 0.50 |
|                                                | S10.9  | 655778.19 | 655533.13 | 98.0  | 804.76  | 104.08 | 36.35 | 0.61 | 0.93 | 0.88 | 2.68 | 0.47 |
|                                                | S10.10 | 655828.49 | 655638.89 | 93.6  | 658.74  | 95.08  | 34.86 | 0.54 | 0.92 | 0.83 | 7.34 | 0.52 |
|                                                | S10.11 | 655631.08 | 655474.82 | 90.8  | 1804.63 | 153.80 | 53.57 | 0.63 | 0.96 | 0.89 | 4.46 | 0.54 |
| <b>S11 / Bulbucani - La țarina veche</b>       | S11.1  | 655421.79 | 671037.49 | 109.5 | 943.31  | 113.15 | 39.21 | 0.61 | 0.93 | 0.88 | 4.92 | 0.50 |
|                                                | S11.2  | 655404.74 | 670989.05 | 105.4 | 832.23  | 104.68 | 36.31 | 0.63 | 0.95 | 0.90 | 4.60 | 0.48 |
|                                                | S11.3  | 655449.35 | 670922.48 | 102.2 | 1293.28 | 132.08 | 44.79 | 0.64 | 0.93 | 0.91 | 4.42 | 0.48 |
|                                                | S11.4  | 655461.61 | 670964.49 | 105.3 | 1219.03 | 127.51 | 43.92 | 0.63 | 0.94 | 0.90 | 4.29 | 0.45 |
|                                                | S11.5  | 655502.09 | 670987.04 | 108.3 | 1335.24 | 133.80 | 49.01 | 0.56 | 0.94 | 0.84 | 5.12 | 0.47 |
|                                                | S11.6  | 655562.17 | 670991.93 | 110.1 | 1744.75 | 157.04 | 60.18 | 0.48 | 0.89 | 0.78 | 4.89 | 0.48 |
|                                                | S11.7  | 655569.80 | 670917.71 | 105.4 | 1188.48 | 125.48 | 42.56 | 0.66 | 0.95 | 0.91 | 4.28 | 0.48 |
|                                                | S11.8  | 655612.48 | 670975.07 | 110.4 | 789.63  | 103.15 | 34.73 | 0.65 | 0.93 | 0.91 | 5.20 | 0.46 |
|                                                | S11.9  | 655665.79 | 670957.60 | 110.7 | 791.51  | 106.96 | 41.14 | 0.47 | 0.87 | 0.77 | 4.75 | 0.48 |
|                                                | S11.10 | 655749.42 | 670928.76 | 111.7 | 897.68  | 109.31 | 36.47 | 0.67 | 0.94 | 0.93 | 4.52 | 0.50 |
|                                                | S11.11 | 655663.38 | 670889.03 | 106.3 | 1047.78 | 119.38 | 45.20 | 0.51 | 0.92 | 0.81 | 4.06 | 0.50 |
|                                                | S11.12 | 655628.33 | 670863.53 | 103.6 | 1220.53 | 128.70 | 48.12 | 0.53 | 0.93 | 0.82 | 4.44 | 0.50 |
|                                                | S11.13 | 655400.99 | 670947.27 | 102.4 | 662.40  | 94.80  | 33.86 | 0.58 | 0.93 | 0.86 | 4.02 | 0.51 |
|                                                | S11.14 | 655709.35 | 670842.55 | 104.8 | 1045.65 | 119.67 | 41.65 | 0.60 | 0.92 | 0.88 | 4.10 | 0.45 |
|                                                | S11.15 | 655782.32 | 670877.64 | 109.3 | 796.15  | 102.17 | 35.85 | 0.62 | 0.96 | 0.89 | 5.02 | 0.48 |
|                                                | S11.16 | 655857.88 | 670930.13 | 115.2 | 865.02  | 107.63 | 37.97 | 0.60 | 0.94 | 0.87 | 4.78 | 0.48 |
|                                                | S11.17 | 655888.02 | 670889.62 | 113.9 | 696.75  | 95.83  | 34.97 | 0.57 | 0.95 | 0.85 | 4.47 | 0.49 |
|                                                | S11.18 | 655820.14 | 670809.50 | 106.4 | 1048.10 | 116.92 | 38.33 | 0.71 | 0.96 | 0.95 | 4.00 | 0.42 |
|                                                | S11.19 | 655819.49 | 670895.37 | 111.6 | 725.77  | 97.87  | 31.47 | 0.73 | 0.95 | 0.97 | 5.38 | 0.53 |
| <b>S12 / Focuri - Dealul Rotund</b>            | S12.1  | 653967.55 | 665452.90 | 68.4  | 939.58  | 110.81 | 39.01 | 0.62 | 0.96 | 0.89 | 5.69 | 0.49 |
|                                                | S12.2  | 654036.28 | 665474.87 | 67.5  | 570.26  | 86.72  | 30.65 | 0.61 | 0.95 | 0.88 | 4.36 | 0.47 |
|                                                | S12.3  | 654100.18 | 665459.40 | 69.5  | 951.46  | 114.57 | 42.87 | 0.52 | 0.91 | 0.81 | 5.07 | 0.51 |
|                                                | S12.4  | 654152.40 | 665457.77 | 69.5  | 1032.49 | 119.70 | 42.78 | 0.56 | 0.91 | 0.85 | 8.32 | 0.44 |
|                                                | S12.5  | 654059.12 | 665389.10 | 74.5  | 1015.69 | 115.65 | 38.99 | 0.67 | 0.95 | 0.92 | 6.12 | 0.48 |
| <b>S13 / Focuri - Dealul Păișului</b>          | S13.1  | 653414.23 | 662432.23 | 84.8  | 998.99  | 115.05 | 41.59 | 0.58 | 0.95 | 0.86 | 5.61 | 0.51 |
|                                                | S13.2  | 653467.64 | 662405.53 | 90.1  | 1103.19 | 121.65 | 41.34 | 0.65 | 0.94 | 0.91 | 5.60 | 0.48 |
|                                                | S13.3  | 653512.22 | 662438.85 | 90.1  | 567.34  | 86.47  | 30.61 | 0.61 | 0.95 | 0.88 | 6.20 | 0.55 |

|                                         |        |           |           |       |         |        |       |      |      |      |      |      |
|-----------------------------------------|--------|-----------|-----------|-------|---------|--------|-------|------|------|------|------|------|
|                                         | S13.4  | 653537.98 | 662497.26 | 85.6  | 1000.14 | 118.24 | 41.46 | 0.58 | 0.90 | 0.86 | 6.45 | 0.51 |
|                                         | S13.5  | 653518.78 | 662218.93 | 99.1  | 1063.30 | 120.04 | 42.17 | 0.60 | 0.93 | 0.87 | 5.53 | 0.48 |
|                                         | S13.6  | 653579.23 | 662307.97 | 102.2 | 789.66  | 103.75 | 36.54 | 0.59 | 0.92 | 0.87 | 4.89 | 0.47 |
|                                         | S13.7  | 653562.63 | 662390.56 | 96.9  | 695.37  | 95.46  | 32.98 | 0.64 | 0.96 | 0.90 | 5.24 | 0.57 |
|                                         | S13.8  | 653640.74 | 662548.97 | 83.2  | 1099.49 | 120.22 | 41.16 | 0.65 | 0.96 | 0.91 | 7.16 | 0.52 |
|                                         | S13.9  | 653736.11 | 662646.90 | 85.0  | 1231.93 | 127.03 | 44.22 | 0.63 | 0.96 | 0.90 | 5.65 | 0.51 |
|                                         | S13.10 | 653684.12 | 662670.88 | 80.1  | 820.64  | 103.83 | 36.89 | 0.60 | 0.96 | 0.88 | 5.02 | 0.49 |
|                                         | S13.11 | 653746.53 | 662746.09 | 81.3  | 845.09  | 109.09 | 42.17 | 0.48 | 0.89 | 0.78 | 4.67 | 0.48 |
|                                         | S13.12 | 653596.75 | 662483.12 | 89.1  | 1010.61 | 116.62 | 40.90 | 0.60 | 0.93 | 0.88 | 6.05 | 0.48 |
| S14 / Mihail Kogălniceanu               | S13.13 | 653686.95 | 662706.95 | 79.2  | 684.23  | 94.80  | 32.44 | 0.65 | 0.96 | 0.91 | 4.48 | 0.44 |
|                                         | S14.1  | 652207.98 | 683436.00 | 94.5  | 1067.04 | 120.10 | 43.33 | 0.57 | 0.93 | 0.85 | 4.16 | 0.52 |
|                                         | S14.2  | 652091.21 | 683574.43 | 92.8  | 1039.83 | 117.07 | 40.90 | 0.62 | 0.95 | 0.89 | 3.74 | 0.44 |
|                                         | S14.3  | 652093.52 | 683638.34 | 95.5  | 920.48  | 110.71 | 37.90 | 0.64 | 0.94 | 0.90 | 4.15 | 0.54 |
| S15 / Gropnița I - Dealul de ceea parte | S14.4  | 652236.71 | 683354.24 | 92.2  | 562.92  | 87.32  | 31.35 | 0.57 | 0.93 | 0.85 | 5.54 | 0.53 |
|                                         | S15.1  | 652326.23 | 671399.42 | 64.6  | 1110.39 | 121.13 | 42.79 | 0.61 | 0.95 | 0.88 | 5.82 | 0.50 |
|                                         | S15.2  | 652329.34 | 671447.78 | 60.4  | 530.32  | 85.78  | 30.96 | 0.55 | 0.91 | 0.84 | 5.08 | 0.53 |
|                                         | S15.3  | 652320.89 | 671502.28 | 57.4  | 469.75  | 80.92  | 31.07 | 0.49 | 0.90 | 0.79 | 3.54 | 0.45 |
|                                         | S15.4  | 652294.06 | 671427.76 | 63.4  | 586.09  | 88.78  | 31.72 | 0.58 | 0.93 | 0.86 | 5.44 | 0.55 |
|                                         | S15.5  | 652253.52 | 671463.59 | 62.6  | 560.04  | 87.38  | 32.64 | 0.53 | 0.92 | 0.82 | 5.86 | 0.53 |
|                                         | S15.6  | 652444.57 | 671413.84 | 60.2  | 342.31  | 67.62  | 23.86 | 0.60 | 0.94 | 0.87 | 4.18 | 0.58 |
|                                         | S15.7  | 652417.08 | 671369.67 | 63.7  | 191.46  | 51.93  | 20.14 | 0.47 | 0.89 | 0.77 | 6.20 | 0.52 |
|                                         | S15.8  | 652372.21 | 671372.84 | 65.4  | 420.69  | 76.25  | 28.06 | 0.53 | 0.91 | 0.82 | 5.09 | 0.52 |
|                                         | S15.9  | 652375.63 | 671418.02 | 61.1  | 819.75  | 112.21 | 47.18 | 0.37 | 0.82 | 0.68 | 6.51 | 0.47 |
| S16 / Focuri - Dealul Lacului           | S15.10 | 652409.43 | 671462.48 | 57.1  | 469.39  | 84.41  | 33.54 | 0.42 | 0.83 | 0.73 | 3.41 | 0.35 |
|                                         | S16.1  | 652048.43 | 669116.73 | 62.8  | 286.18  | 61.42  | 21.41 | 0.62 | 0.95 | 0.89 | 4.33 | 0.56 |
|                                         | S16.2  | 652069.29 | 669141.87 | 63.4  | 522.71  | 83.48  | 30.60 | 0.56 | 0.94 | 0.84 | 2.65 | 0.49 |
|                                         | S16.3  | 652106.94 | 669175.63 | 64.4  | 1674.51 | 147.79 | 49.75 | 0.68 | 0.96 | 0.93 | 2.06 | 0.58 |
|                                         | S16.4  | 652163.76 | 669158.44 | 66.2  | 701.79  | 95.49  | 31.89 | 0.69 | 0.97 | 0.94 | 1.90 | 0.42 |
|                                         | S16.5  | 652173.67 | 669090.57 | 68.1  | 615.16  | 93.79  | 34.59 | 0.51 | 0.88 | 0.81 | 2.96 | 0.51 |
|                                         | S16.6  | 652109.27 | 669090.69 | 65.6  | 539.95  | 84.30  | 28.08 | 0.68 | 0.96 | 0.93 | 2.30 | 0.50 |
|                                         | S16.7  | 652107.22 | 669050.59 | 66.5  | 548.34  | 84.49  | 28.66 | 0.67 | 0.97 | 0.92 | 2.85 | 0.50 |
|                                         | S16.8  | 652144.60 | 669032.92 | 68.8  | 656.10  | 92.45  | 32.48 | 0.62 | 0.96 | 0.89 | 3.84 | 0.48 |
| S17 / Gropnița II – SE of the village   | S16.9  | 652099.93 | 668997.52 | 68.4  | 635.51  | 91.33  | 31.53 | 0.64 | 0.96 | 0.90 | 3.98 | 0.50 |
|                                         | S17.1  | 651400.45 | 673522.06 | 63.6  | 504.10  | 84.02  | 31.55 | 0.51 | 0.90 | 0.80 | 5.52 | 0.48 |
|                                         | S17.2  | 651412.68 | 673436.16 | 70.8  | 634.06  | 91.91  | 31.28 | 0.65 | 0.94 | 0.91 | 6.68 | 0.50 |
|                                         | S17.3  | 651398.04 | 673406.22 | 71.3  | 863.73  | 106.14 | 35.57 | 0.68 | 0.96 | 0.93 | 7.06 | 0.48 |
|                                         | S17.4  | 651382.53 | 673355.87 | 71.7  | 952.21  | 111.80 | 38.56 | 0.64 | 0.96 | 0.90 | 6.93 | 0.47 |
|                                         | S17.5  | 651346.15 | 673449.98 | 65.3  | 1018.20 | 118.40 | 44.42 | 0.52 | 0.91 | 0.81 | 5.49 | 0.48 |
|                                         | S17.6  | 651349.83 | 673395.44 | 67.3  | 1101.25 | 119.71 | 40.26 | 0.68 | 0.97 | 0.93 | 6.66 | 0.50 |
|                                         | S17.7  | 651360.27 | 673294.11 | 72.3  | 873.28  | 108.41 | 39.23 | 0.57 | 0.93 | 0.85 | 6.22 | 0.45 |
|                                         | S17.8  | 651295.98 | 673298.18 | 67.5  | 800.31  | 105.05 | 39.64 | 0.51 | 0.91 | 0.81 | 4.99 | 0.44 |
|                                         | S17.9  | 651290.03 | 673233.23 | 70.7  | 1025.02 | 115.50 | 38.73 | 0.68 | 0.97 | 0.93 | 7.02 | 0.51 |
| S18 / Potângeni - Buda                  | S17.10 | 651444.51 | 673372.27 | 77.4  | 1023.44 | 116.09 | 40.44 | 0.63 | 0.95 | 0.89 | 6.01 | 0.48 |
|                                         | S18.1  | 650780.47 | 674809.07 | 105.8 | 1487.32 | 139.36 | 48.82 | 0.62 | 0.96 | 0.89 | 6.37 | 0.50 |
|                                         | S18.2  | 650781.20 | 674724.27 | 109.0 | 1150.04 | 124.60 | 44.56 | 0.58 | 0.93 | 0.86 | 5.91 | 0.47 |
|                                         | S18.3  | 650695.83 | 674835.17 | 97.4  | 1165.61 | 123.88 | 40.99 | 0.69 | 0.95 | 0.94 | 7.46 | 0.51 |
|                                         | S18.4  | 650840.11 | 674756.07 | 111.4 | 1045.52 | 117.59 | 39.46 | 0.67 | 0.95 | 0.92 | 5.18 | 0.48 |
| S19 / Larga Jijia - La grădină          | S18.5  | 650701.31 | 674719.51 | 102.1 | 590.11  | 89.98  | 33.72 | 0.52 | 0.92 | 0.81 | 6.72 | 0.46 |
|                                         | S19.1  | 649920.08 | 681176.49 | 46.2  | 482.16  | 84.25  | 29.51 | 0.55 | 0.85 | 0.84 | 1.95 | 0.57 |
|                                         | S19.2  | 649982.88 | 681148.99 | 46.4  | 900.32  | 108.59 | 37.57 | 0.64 | 0.96 | 0.90 | 1.92 | 0.58 |
|                                         | S19.3  | 650025.61 | 681183.74 | 45.4  | 909.36  | 112.93 | 42.12 | 0.51 | 0.90 | 0.81 | 2.13 | 0.50 |
|                                         | S19.4  | 650084.82 | 681165.52 | 45.1  | 1511.10 | 144.78 | 53.14 | 0.54 | 0.91 | 0.83 | 1.42 | 0.34 |
| S20 / Erbiceni - Iazul Spinoasei        | S19.5  | 649988.55 | 681216.52 | 44.3  | 404.84  | 73.44  | 24.71 | 0.66 | 0.94 | 0.92 | 6.57 | 0.38 |
|                                         | S20.1  | 648537.51 | 665903.76 | 112.8 | 905.32  | 108.05 | 36.53 | 0.68 | 0.97 | 0.93 | 6.76 | 0.48 |
|                                         | S20.2  | 648551.65 | 665820.87 | 120.3 | 836.91  | 106.62 | 39.30 | 0.54 | 0.93 | 0.83 | 5.92 | 0.48 |
|                                         | S20.3  | 648514.99 | 665846.07 | 115.7 | 1151.47 | 123.24 | 43.42 | 0.61 | 0.95 | 0.88 | 6.65 | 0.47 |
|                                         | S20.4  | 648490.48 | 665781.64 | 119.4 | 931.77  | 109.51 | 35.23 | 0.75 | 0.98 | 0.98 | 7.17 | 0.49 |
|                                         | S20.5  | 648469.29 | 665844.15 | 112.2 | 939.30  | 111.07 | 39.68 | 0.60 | 0.96 | 0.87 | 6.45 | 0.51 |
|                                         | S20.6  | 648452.56 | 665814.34 | 113.8 | 492.65  | 79.70  | 26.12 | 0.72 | 0.97 | 0.96 | 6.22 | 0.54 |
|                                         | S20.7  | 648399.78 | 665801.98 | 111.7 | 1188.27 | 125.81 | 45.91 | 0.56 | 0.94 | 0.85 | 6.85 | 0.49 |
|                                         | S20.8  | 648353.08 | 665793.93 | 110.5 | 657.50  | 93.27  | 32.94 | 0.61 | 0.95 | 0.88 | 6.89 | 0.46 |
|                                         | S20.9  | 648457.34 | 665761.97 | 119.2 | 450.42  | 76.71  | 26.73 | 0.63 | 0.96 | 0.90 | 8.05 | 0.55 |
|                                         | S20.10 | 648219.29 | 665770.46 | 111.8 | 706.25  | 97.43  | 36.71 | 0.52 | 0.94 | 0.82 | 7.29 | 0.50 |
|                                         | S20.11 | 648159.94 | 665788.38 | 109.5 | 809.80  | 106.60 | 43.38 | 0.43 | 0.90 | 0.74 | 6.13 | 0.51 |
|                                         | S20.12 | 648135.93 | 665806.25 | 107.8 | 574.01  | 92.55  | 34.87 | 0.47 | 0.84 | 0.78 | 5.40 | 0.43 |

|                                         |        |           |           |       |         |        |       |      |      |      |      |      |
|-----------------------------------------|--------|-----------|-----------|-------|---------|--------|-------|------|------|------|------|------|
|                                         | S20.13 | 648134.72 | 665739.48 | 114.2 | 1307.45 | 130.16 | 43.41 | 0.69 | 0.97 | 0.94 | 6.46 | 0.47 |
|                                         | S20.14 | 648101.67 | 665810.50 | 107.2 | 335.53  | 66.31  | 23.16 | 0.63 | 0.96 | 0.89 | 5.80 | 0.48 |
|                                         | S20.15 | 648332.18 | 665740.90 | 116.6 | 614.36  | 95.22  | 36.62 | 0.46 | 0.85 | 0.76 | 7.67 | 0.48 |
|                                         | S20.16 | 648274.51 | 665755.46 | 113.5 | 338.78  | 67.84  | 22.84 | 0.65 | 0.93 | 0.91 | 6.77 | 0.45 |
| S21 / Tăutești - Hârtopul Lingurariului | S21.1  | 640700.88 | 687337.62 | 100.4 | 823.51  | 103.57 | 35.19 | 0.67 | 0.97 | 0.92 | 3.48 | 0.52 |
|                                         | S21.2  | 640740.10 | 687328.82 | 101.5 | 550.29  | 85.21  | 29.61 | 0.63 | 0.95 | 0.89 | 3.57 | 0.50 |
|                                         | S21.3  | 640833.39 | 687359.99 | 104.6 | 1085.77 | 121.25 | 44.86 | 0.54 | 0.93 | 0.83 | 2.24 | 0.54 |
|                                         | S21.4  | 640756.94 | 687396.53 | 104.4 | 1584.84 | 143.31 | 46.67 | 0.73 | 0.97 | 0.96 | 2.88 | 0.61 |
|                                         | S21.5  | 640730.16 | 687428.71 | 103.6 | 775.94  | 101.55 | 36.12 | 0.59 | 0.95 | 0.87 | 3.31 | 0.52 |
|                                         | S21.6  | 640623.43 | 687342.54 | 97.8  | 440.23  | 77.79  | 29.20 | 0.52 | 0.91 | 0.81 | 3.33 | 0.49 |
|                                         | S21.7  | 640856.11 | 687281.50 | 102.0 | 1211.31 | 128.39 | 47.63 | 0.53 | 0.92 | 0.82 | 3.41 | 0.58 |
|                                         | S21.8  | 640643.76 | 687373.04 | 99.1  | 388.61  | 71.23  | 24.03 | 0.67 | 0.96 | 0.93 | 2.77 | 0.51 |
|                                         | S21.9  | 640681.05 | 687393.07 | 100.9 | 521.00  | 84.13  | 31.39 | 0.53 | 0.93 | 0.82 | 2.77 | 0.51 |
|                                         | S21.10 | 640684.43 | 687457.29 | 101.0 | 763.13  | 99.57  | 33.35 | 0.69 | 0.97 | 0.93 | 3.66 | 0.52 |
